1 **Mapping resources available for early identification and recovery-oriented intervention**  
2 **for people with psychosis in Addis Ababa, Ethiopia**

3  
4 Mekonnen Tsehay<sup>1</sup>, Teshome Shibre Kelkile<sup>1,2,3</sup>, Wubalem Fekadu<sup>1</sup>, Alex Cohen<sup>4</sup>, Eleni  
5 Misganaw<sup>5</sup>, Charlotte Hanlon<sup>1,6,7</sup>

6 <sup>1</sup>Department of Psychiatry and WHO Collaborating Centre for Mental Health Research and  
7 Capacity-Building, School of Medicine, College of Health Sciences, Addis Ababa University,  
8 Addis Ababa, Ethiopia,

9 <sup>2</sup>Horizon Network Zone 3, NB, Canada,

10 <sup>3</sup>Department of Psychiatry, Dalhousie University, NS, Canada

11 <sup>4</sup>Department of Population Health, London School of Hygiene & Tropical Medicine, London,  
12 UK

13 <sup>5</sup>Mental Health Service Users Association, Addis Ababa Ethiopia

14 <sup>6</sup>Centre for Global Mental Health, Health Service and Population Research Department, and  
15 WHO Collaborating Centre for Mental Health Research and Training, Institute of Psychiatry,  
16 Psychology, and Neuroscience, King's College London, London, UK

17 <sup>7</sup>Centre for Innovative Drug Development and Therapeutic Trials for Africa, College of Health  
18 Sciences, Addis Ababa University, Addis Ababa, Ethiopia

19

20 **Corresponding author:** Mekonnen Tsehay, Email: [jimma1760@gmail.com](mailto:jimma1760@gmail.com)

21 **Short title:** Resource mapping for people with psychosis; identification and interventions

22

## 23 Abstract

24 **Background:** There is a pressing need to reduce the long duration of untreated illness and  
25 improve care and outcomes for people with psychosis in Ethiopia. This study aimed to map  
26 community resources that have the potential to be leveraged to achieve earlier and more  
27 recovery-oriented interventions for people with psychosis in Addis Ababa, Ethiopia.

28 **Method:** A strength-based resource mapping exercise was undertaken in two sub-cities, covering  
29 an estimated population of half a million people. We identified the types of resources to be  
30 mapped, based on their importance for multi-sectoral care in mental health: healthcare facilities,  
31 religious organisations, traditional and faith healers, non-governmental organisations (NGOs),  
32 and social/community organisations. The lead investigator traversed the study sites to gather  
33 information on community resources, recorded the Global Positioning System (GPS) coordinates  
34 of the resources, and consulted with key informants. The information obtained was  
35 complemented by a participatory Theory of Change workshop attended by 30 stakeholders.

36 **Results:** We identified 124 health facilities, of which only 16 health centres and nine hospitals  
37 currently provide mental health services. We identified three registered traditional healers, 38  
38 religious organisations, 104 non-governmental organisations, and other charitable/community-  
39 based organisations. In addition, three health facilities, six holy water religious healing sites, and  
40 four traditional healers were identified as out-of-site resources that were popular and frequently  
41 visited by people living in the sub-cities. The two sub-cities also had six feeding centres each  
42 providing meals for 1000 people in need. There were extensive networks of social organisations  
43 and community-based associations. Existing care pathways are complex but commonly include  
44 traditional and religious healing sites as places of first contact.

45    **Conclusions:** We identified important available resources that provide a wealth of opportunities  
46    for improving the early identification and outcomes of people with psychosis.

47

48    **Keywords:** Community mental health; psychosis; traditional and faith healers; social inclusion;  
49    medical pluralism; strengths-based

50

## 51 Introduction

52 In low- and middle-income countries (LMICs), the majority of people with psychosis either do  
53 not access any care or experience substantial delays in receiving care (1). An estimated 70%-  
54 90% of people with psychosis in need of mental health care in LMICs do not receive it (2, 3).  
55 According to community-based studies conducted in Ethiopia, the median duration of untreated  
56 illness in people with psychosis was more than five to seven years (4, 5). Even when care is  
57 accessed, it is often narrowly biomedical and fails to address prominent social and economic  
58 needs (6, 7).

59

60 The consequences of absent, delayed, or inadequate care for people with psychosis are  
61 substantial in terms of impairing a person's capacity to function in social, familial, and economic  
62 domains. Furthermore, stigma, prejudice, and violations of human rights are commonly  
63 experienced by persons with psychosis, exacerbated by a lack of effective treatment (6, 8-10).  
64 Although there are multiple factors contributing to treatment delays and the long duration of  
65 untreated psychosis, the most frequently cited relate to the demand side (e.g., financial  
66 constraints, stigma, differing explanatory models of illness) and supply-side factors (e.g. lack of  
67 available, accessible and adequate mental health services) (11, 12). Consequently, help-seeking  
68 pathways are often convoluted and may involve multiple contacts with traditional and/or faith  
69 healers or non-specialist healthcare providers before accessing mental health services (13, 14).  
70 Even when mental health services are accessed, engagement is often intermittent and poorly  
71 coordinated with pluralistic approaches to care (15, 16). There is evidence that earlier and better  
72 interventions for people with psychosis lead to better health and social outcomes, as well as  
73 lower costs (17-19).

74 The World Health Organization (WHO) has published guidance on person-centered and rights-  
75 based approaches to community mental health care, recommending the inclusion of communities  
76 to support pluralism of care and the provision of psychosocial interventions to augment  
77 biomedical care (20). This community-focused approach first requires an understanding of the  
78 potential contributions of both formal biomedical care and informal community-based traditional  
79 and religious healers, as well as organisations supporting social and economic well-being, to  
80 build on existing resources when designing interventions. In a previous study from rural  
81 Ethiopia, strengths-based mapping in a rural district identified rich community resources (21)  
82 that formed an input into the design of models of care for people with psychosis (22, 23). In the  
83 Ethiopia PRIME study, inter-linked interventions at the level of community, facility, and health  
84 system led to improved functioning, better socio-economic status, and reduced experiences of  
85 discrimination and abuse (4, 24). In the Ethiopia RISE trial, community-based rehabilitation led  
86 to improved functioning in people with psychosis who had not responded to primary healthcare-  
87 based mental health care (25).

88  
89 Evaluation of efforts to increase access to mental health care in Ethiopia has focused on rural  
90 settings. There may be distinct opportunities and challenges in the capital city of Addis Ababa;  
91 for example, in terms of greater availability and accessibility of mental health services but also  
92 the potential for fragmentation of care, more transient populations, less social capital, and a  
93 visible population of people who are homeless and have apparent psychosis (26). Little is known  
94 about community resources in Addis Ababa and how they might be harnessed. Therefore, this  
95 study aimed to map resources that have the potential to be leveraged to achieve earlier and more  
96 holistic interventions for people with psychosis in Addis Ababa, Ethiopia.

## 97 Methods

### 98 Study design

99 We conducted a strength-based resource mapping exercise from 13<sup>th</sup> September to 10<sup>th</sup> October  
100 2022. This approach includes exploring, describing, and mapping community resources before  
101 employing these resources to develop solutions to a specific problem (27). Underpinning this  
102 method is a strengths-based orientation that seeks to build on the strengths of individuals,  
103 families, and communities (28).

104  
105 The study was nested within the formative phase of a larger project, SCOPE (Studying the  
106 Contexts of Recent Onset Psychoses in Ethiopia) (29). SCOPE aims to produce contextual  
107 evidence about psychosis and uses participatory methods to design and evaluate innovations to  
108 achieve earlier detection and care to improve the lives of people living with psychosis in rural  
109 and urban settings in Ethiopia.

110

### 111 Setting

112 The urban sites included in SCOPE are Lideta and Kirkos sub-cities of Addis Ababa, the capital  
113 city of Ethiopia. According to the Central Statistical Agency of Ethiopia (CSA), in 2022 (30), the  
114 projected population of the sub-cities is 595, 973 (284, 208 in Lideta and 311, 765 in Kirkos).  
115 The total area of the sub-cities is 52,284.1 square kilometres.

116

### 117 Procedures

118 We identified the types of resources to be mapped based on their importance for mental health:  
119 healthcare facilities, religious organisations, traditional and faith healers, non-governmental

120 organisations (NGOs), and social/community organisations. The lead investigator then traversed  
121 the study sites to gather information on community resources, recorded the global positioning  
122 system (GPS) coordinates of the place or organization, and consulted with key informants to  
123 discover where people sought help for mental health conditions and the potential role of their  
124 organization concerning early identification and care.

125  
126 We then developed an initial list of resources based on: (1) community or organization  
127 consultation; and (2) official lists of registered traditional healers and health facilities in each  
128 sub-city. Data were recorded about the total catchment population, mental health service  
129 provision (including the number of psychiatrists, mid-level mental health professionals, and  
130 psychologists), and number of general health workers who had been trained with the World  
131 Health Organization's mental health Gap Action Programme (mhGAP) in line with the National  
132 Mental Health Strategy of Ethiopia (31). We also recorded the presence of international or  
133 national charitable organisations and social organisations (*Edir* (burial groups, supporting  
134 saving) by searching through the districts of sub-cities.

135  
136 The mapping information was complemented by a participatory Theory of Change (TOC)  
137 workshop attended by 30 stakeholders. The participants were people with lived experience of  
138 mental health conditions, family members, religious leaders, traditional healers, health  
139 administration officials, community-based health workers, police, social affairs officials, NGO  
140 representatives, and community leaders. The TOC workshop aimed to obtain further information  
141 on pathways to care and existing opportunities for intervention to support people with psychosis

142 to achieve valued outcomes. The workshop was moderated by two facilitators. Minutes were  
143 taken and used to inform the current analysis.

144

145 Data management and analysis

146 Data were stored in Excel. We summarized the data descriptively (frequency and percentage)

147 and plotted the location of the organization and facilities on maps to visualize the distribution of

148 resources.

149

150 Ethical considerations

151 We received ethical approval from the Institutional Review Board of the College of Health

152 Science, Addis Ababa University (084/11/PSY) and Kings College London as part of a baseline

153 situation appraisal. We also obtained permission letters from each sub-city.

154



## 155 Results

156 Within each sub-city, we identified a wide array of community resources. These included health  
157 facilities, traditional healers, religious organisations, NGOs, and other charitable/community-  
158 based organisations. Alongside this, we identified out-of-site resources that were popular and  
159 frequently visited by people living in the sub-cities. The two sub-cities also had feeding centres,  
160 and social organisations: *Edir* (burial groups, supporting saving), *Equb* (small financial group),  
161 *Tsiwa Mahiber* (mostly religious groups), youth associations, women's associations, elderly  
162 associations, and disability associations. Existing care pathways are complex but commonly  
163 include traditional and religious healing sites as places for both first contact and continuing  
164 contacts utilized alongside mental health services.

165

### 166 Health sector

167 In Kirkos sub-city, there are eight public health centres, 59 private clinics, and five hospitals  
168 (three private, and two public). In Lideta sub-city, there are eight public health centres, 44  
169 private clinics, and eight hospitals (five private, one public, the Federal police general hospital,  
170 and the Defense Forces general hospital). All public health centres and hospitals provide mental  
171 health services, except one health center in Kirkos.

172

### 173 Primary mental health care

174 In the health centres, mental health care is provided in outpatient clinics by psychiatric nurses  
175 and masters-level mental health practitioners working alongside WHO mhGAP-trained general  
176 health care workers (nurses or health officers). Commonly the mhGAP-trained nurse or health  
177 officers were assigned to antiretroviral therapy (ART) and cancer clinic out-patient clinics. They

178 consult mental health professionals when they see new people presenting with mental health  
179 conditions (Table 1). The patient flow is not more than 15 per month in each health centre for all  
180 mental health conditions combined, for a population served of around 35,000 people. In some  
181 health centres, mental health professionals participate in non-mental health managerial duties of  
182 the health centres rather than direct delivery of mental health care.

183

184 Hospital-level secondary and tertiary mental health services

185 Black Lion Comprehensive Specialized Hospital (Lideta sub-city) has an outpatient psychiatric  
186 clinic staffed with 23 psychiatrists, five psychiatric nurses, and seven clinical psychologists.

187 Zewditu Memorial Referral Hospital (Kirkos sub-city) has an outpatient psychiatric unit, two  
188 crisis admission beds, and a four-bed unit for people with substance use disorders.

189 Psychotherapy services are also provided in these hospitals.

190

191 Table 1: Mental health service in health facilities of Kirkos and Lideta sub-cities

| Health facilities in sub-cities |       | District | Catchment populations | Psychiatric Nurse | MSc Mental health practitioners | Psychiatrist | Psychologist | mhGAP trained personnel |
|---------------------------------|-------|----------|-----------------------|-------------------|---------------------------------|--------------|--------------|-------------------------|
| Health centres                  | HC-1  | KSC-D 2  | 34400                 | 1                 | 0                               | 0            | 0            | 2                       |
|                                 | HC-2  | KSC-D 3  | 18389                 | 1                 | 0                               | 0            | 0            | 3                       |
|                                 | HC-3  | KSC-D 4  | 40,000                | 1                 | 0                               | 0            | 0            | 4                       |
|                                 | HC-4  | KSC-D 5  | 28999                 | 1                 | 0                               | 0            | 0            | 1                       |
|                                 | HC-5  | KSC-D 6  | 16771                 |                   |                                 |              |              | 1                       |
|                                 | HC-6  | KSC-D 8  | 29430                 | 0                 | 0                               | 0            | 0            | 0                       |
|                                 | HC-7  | KSC-D 9  | 28914                 | 1                 | 0                               | 0            | 0            | 2                       |
|                                 | HC-8  | KSC-D 11 | 30108                 | 1                 | 0                               | 0            | 0            | 0                       |
|                                 | HC-9  | LSC-D 1  | 25922                 | 1                 | 0                               | 0            | 0            | 3                       |
|                                 | HC-10 | LSC-D 7  | 97,617                | 0                 | 2                               | 0            | 0            | 10                      |
|                                 | HC-11 | LSC-D 3  | 51,000                | 2                 | 0                               | 0            | 0            | 3                       |
|                                 | HC-12 | LSC-D 2  | 25684                 | 1                 | 0                               | 0            | 0            | 5                       |
|                                 | HC-13 | LSC-D 9  | 31113                 | 1                 | 0                               | 0            | 0            | 4                       |
|                                 | HC-14 | LSC-D 10 | 39763                 | 2                 | 0                               | 0            | 0            | 3                       |
|                                 | HC-15 | LSC-D 8  | 48,000                | 1                 | 0                               | 0            | 0            | 3                       |
|                                 | HC-16 | LSC-D 4  | 25,817                | 1                 | 0                               | 0            | 0            | 0                       |
| Public hospital                 | GH-1  | KSC-D 7  | -                     | 7                 | 0                               | 2            | 1            | 3                       |
|                                 | GH-3  | LSC-D 7  | -                     | 0                 | 0                               | 1            | 0            | 0                       |
|                                 | GH-4  | LSC-D 7  | -                     | 5                 | 0                               | 23           | 7            | 0                       |
| Private hospitals               | PH-1  | KSC-D 7  | -                     | 0                 | 0                               | 1            | 0            | 0                       |
|                                 | PH-2  | KSC-D 9  | -                     | 0                 | 0                               | 2            | 0            | 0                       |
|                                 | PH-3  | KSC-D 4  | -                     | 0                 | 0                               | 2            | 0            | 0                       |
|                                 | PH-4  | LSC-D 10 | -                     | 0                 | 0                               | 1            | 0            | 0                       |
|                                 | PH-5  | LSC-D 3  | -                     | 0                 | 0                               | 2            | 0            | 0                       |
|                                 | PH-6  | LSC-D 4  | -                     | 0                 | 0                               | 2            | 0            | 0                       |
|                                 | PH-7  | LSC-D 7  | -                     | 1                 | 0                               | 0            | 1            | 0                       |

192 *HC=health center, GH=Government/public hospital, PH=private hospital, mhGAP=mental health gap*  
 193 *action programme, LSC-D=Lideta sub-city district, KSC-D=Kirkos Sub-city district*

194 In private hospitals, outpatient and in-patient mental health services are provided by part-time  
195 psychiatrists. The Federal Police Hospital and the Ethiopian Defense Force Hospitals have  
196 psychiatric services but currently, the service is only for the military.

197  
198 Although outside the two sub-cities, referrals are made to Amanuel Mental Health specialized  
199 hospital, a dedicated public mental health hospital with 239 beds, 27 emergency beds, an in-  
200 patient substance use unit, and multiple outpatient clinics with 128, 000 people with MHCs seen  
201 per year. The two main private psychiatric clinics in Addis Ababa are also outside the sub-cities  
202 but accessed by inhabitants (Figure 1).

203

204 **Figure 1. Health care facilities within the study area and popular facilities outside the**  
205 **study area:** LSC-D=Lideta sub-city districts, KSC-D=Kirkos sub-city districts

206

207 Religious, traditional, and faith healer (TFH) sites

208 Within the two sub-cities, we identified three traditional healers (mostly herbalists but also  
209 practicing spiritual or faith-based healing, diviner, giving counsel, and bone setting) and four  
210 holy water healing sites linked to the Ethiopian Orthodox Church. Holy water is typically the  
211 first port of call when a family member has a condition perceived to be triggered by a spiritual or  
212 supernatural problem, an attribution which is commonly linked to severe mental illness. People  
213 drink the holy water or are baptised. They may stay at the holy water site for extended periods  
214 where they are supported by family or overseen by a holy water attendant who is paid for the role  
215 (Table 2).

216

217 There are also other popular holy water places outside the two sub-cities. People also use the  
218 most popular Muslim religious healing site outside of our study area, the Quran home. The holy  
219 Quran will be recited by a person recognized as having gifts of healing. There are 11 Ethiopian  
220 Orthodox Christian churches, 13 protestant churches, nine mosques, and two catholic churches in  
221 the sub-cities (Figure 2).

222

223 **Figure 2. Religious organisations, non-governmental organisations, and traditional and**  
224 **faith healers' sites within and outside the study area:** LSC-D=Lideta sub-city districts, KSC-  
225 D=Kirkos sub-city districts

226

227 Non-governmental and community-based organisations

228 There are more than 104 charitable organisations registered in the two sub-cities. Makedonia,  
229 Selihom, and Gergesenon charitable organisations provide social care and residential services to  
230 people with mental health conditions whose families cannot cope or who have no social support.  
231 They employ master's and degree-level mental health care providers and also work in  
232 collaboration with local mental health services for case reviews by senior psychiatrists.

233

234 Table 2: Religious organisations and their mental health care provision

| Religious organisations                                                                                           | Religious healing practices                                                                                                                                                                                                                                               |
|-------------------------------------------------------------------------------------------------------------------|---------------------------------------------------------------------------------------------------------------------------------------------------------------------------------------------------------------------------------------------------------------------------|
| Ethiopian Orthodox Christian churches<br>Eleven churches with/without holy water<br>Four holy water healing sites | Pray and recite verses from the holy bible for the ill.<br>Bless the water and administer it as holy water.<br>Some have holy water sites visited by several people every day. E.g.: Tekle haymanot, Yohanis, Lideta and St. Mary, and St. Egziabher Ab holy water sites. |
| Nine Muslim mosques                                                                                               | The sheik recites verses from the holy Quran for the ill.<br>Outside of our study area, at the Quran home, the holy Quran will be recited by a gifted person                                                                                                              |
| Thirteen Protestant Christian churches                                                                            | Advertise at least one day per week for faith healing programs.                                                                                                                                                                                                           |
| Two Catholic churches                                                                                             | Priests, recite verses from the holy bible and give “kibakdus”, holy anointing for the ill.                                                                                                                                                                               |
| Three Traditional healers                                                                                         | Traditional healers are often consulted by people with mental illness. They are mostly herbalists, but they practice also spiritual or faith-based healing, divining, advice on what to do, and bone setting)                                                             |

235

236 Community/social organisations

237 Numerous community-based organisations exist. The first is *Edir*, mainly a funeral association  
 238 that provides financial, practical, and emotional support when a family member dies. However,  
 239 the role of *Edir* groups also includes the provision of support to members experiencing various  
 240 social, economic, and health problems. There are an estimated 51 *Edir* associations in each  
 241 district in the Lideta and Kirkos sub-cities. Each group has about 100–620 households as  
 242 members. Individuals can be members of more than one *Edir* association.

243

244 *Tsiwa Mahber* is the second most common type of organization, specific to the Orthodox  
 245 Christian church. Activities include group prayer, singing, and shared meals (called "Tsebel

246 tseidiq" in Amharic) taking place once per month in a member's home or church compound. The  
247 name of a specific *Tsiwa Mahber* association is usually taken from a saint's name. The number  
248 of members may range from 10 to 30.

249  
250 In each of the two sub-cities, there are also many other associations, each with a specific focus:  
251 for young people, women, the elderly, and people with disabilities. Government representatives  
252 directly or indirectly coordinate these non-profit community-based associations. Associations for  
253 the elderly and those with disabilities aim to provide mutual support for members, provide them  
254 with more authority, and uphold their legal rights in society. Members will be the first to receive  
255 funding when it becomes available from relief organisations or the government. Women's  
256 associations work to advance women's rights, increase their participation in family and  
257 community decision-making, and strengthen their economic position. The purpose of the youth  
258 associations is to promote participation in neighborhood events, access to skill development  
259 opportunities, and projects that generate income.

260  
261 Feeding centres

262 The Addis Ababa city administration has established feeding centres throughout the city, to feed  
263 those who are unable to obtain a meal at least once per day. The program is coordinated by the  
264 city administration and funded by volunteers (Table 3).

265  
266 We found that certain community-based organisations and associations are not commonly  
267 accessible for people with severe mental illness for example, Edir, Equb, youth associations,  
268 women's associations, elderly associations, and disability associations. With respect to non-

269 governmental and charitable organisations, target populations for the organization are usually  
270 circumscribed (e.g., for women and children) and often do not include people with severe mental  
271 illness. In feeding centres, people with severe mental illness were able to obtain meal cards from  
272 district officials, as long as they were not acutely unwell. Others could also request/apply for  
273 meal cards for them on their behalf.

274

#### 275 Theory of Change workshop

276 The initial sources of assistance for people with severe mental illness were identified as  
277 community resources, primarily religious healers, holy water sites, and a new outreach service  
278 from primary health care facilities (“family health teams”). To help with community-based case  
279 identification, access to care, and to support holistic recovery for a person with psychosis,  
280 collaboration and the establishment of referral systems were recommended.

281



282 Table 3: Feeding centres in the SCOPE study area (Kirkos and Lideta sub-cities of Addis  
 283 Ababa)

| Sub-city | Feeding centres                        | Fund/supported by                                                                                                                                                                                                                                | No of beneficiaries                                                                                                                                           |
|----------|----------------------------------------|--------------------------------------------------------------------------------------------------------------------------------------------------------------------------------------------------------------------------------------------------|---------------------------------------------------------------------------------------------------------------------------------------------------------------|
| Kirkos   | District/woreda 4                      | <ol style="list-style-type: none"> <li>1. Belayneh kindie PLC</li> <li>2. Tilahun Abateneh building PLC.</li> <li>3. Medrok PLC</li> <li>4. Hints college</li> <li>5. Black Lion Hospital</li> <li>6. Addis Ababa city administration</li> </ol> | Centres feed lunch every day for individuals selected by district officials on the bases of need. The plan is to feed up to 4000, but currently 1000 per day. |
|          | District/woreda 5                      |                                                                                                                                                                                                                                                  |                                                                                                                                                               |
|          | District/woreda 9                      |                                                                                                                                                                                                                                                  |                                                                                                                                                               |
|          | District/woreda 10                     |                                                                                                                                                                                                                                                  |                                                                                                                                                               |
| Lideta   | District/woreda 9                      | <ol style="list-style-type: none"> <li>4. Hints college</li> <li>5. Black Lion Hospital</li> <li>6. Addis Ababa city administration</li> </ol>                                                                                                   |                                                                                                                                                               |
|          | District/woreda 10                     |                                                                                                                                                                                                                                                  |                                                                                                                                                               |
|          | St. Lideta church (district/woreda 10) | Sunday school students receive money from another volunteer                                                                                                                                                                                      | People around the church on Saturdays one lunch/week                                                                                                          |

284

285

## 286 Discussion

287 In this study, we aimed to map available mental health care resources in two sub-cities of Addis  
288 Ababa to inform improved care planning for people with psychosis. We identified health  
289 facilities, registered traditional healers, religious organisations, and charitable/community-based  
290 organisations. We also found popular resources outside of the two sub-cities. Feeding centres,  
291 social organisations youth associations, women's associations, elderly associations, and disability  
292 associations were also considered important but not always available to people with psychosis  
293 and their families. Traditional and faith healing sites are commonly the places of first contact.  
294  
295 Similar to a resource mapping exercise conducted in a rural Ethiopian district, there are rich  
296 cultural and social resources that may contribute to the recovery of people with psychosis in  
297 Addis Ababa (32). Our findings of many diverse community organisations indicated that ties to  
298 local community structures remain salient in this capital city, contrary to our expectations.  
299 Nonetheless, many community supports appear not to be fully accessible to people with severe  
300 mental illness. More in-depth research is required to understand the reasons for this. In rural  
301 areas, there is evidence that stigma and impoverishment fuel the exclusion of people with  
302 psychosis from community life (33, 34). Even disability organisations that would be expected to  
303 address the needs of people with psychosis define themselves narrowly as only catering to the  
304 needs of people with physical disabilities. A fruitful strategy may, therefore, focus on stigma  
305 reduction alongside advocacy directed at organizations and services that have the most potential  
306 to provide services for people with MHCs and their families. The recent Lancet Commission on  
307 ending mental health stigma and discrimination (35), identified social contact interventions  
308 involving people with lived experience of MHCs to be the most effective way to reduce stigma.

309 In the SCOPE project, within which this study is nested, we are working with the Mental Health  
310 Service User Association of Ethiopia to develop such interventions to overcome exclusion.  
311  
312 Religious and traditional healing are integral aspects of care for many people with psychosis in  
313 Ethiopia. Our context mapping identified numerous and important healing sites within and  
314 around Addis Ababa where people with psychosis and their families seek help. Holy water sites  
315 linked to the Ethiopian Orthodox Church, charismatic Protestant churches, and Mosques all  
316 provided faith healing. Alongside religious approaches were a variety of traditional healers using  
317 herbs, medicines, and eclectic approaches to healing. Although mental health services in Addis  
318 Ababa are much more accessible than in rural areas, religious and traditional approaches are  
319 usually the first port of call. In an old study conducted at the main psychiatric hospital, Amanuel  
320 Specialized Mental Hospital, only 41% of service users came directly to the hospital, with the  
321 remaining trying alternatives first (13). In Ethiopia, people with psychosis and their families  
322 commonly seek out biomedical mental healthcare services after investing a substantial amount of  
323 time and money in alternative places (13, 14, 36). This concern was also raised by the  
324 stakeholders in our Theory of Change workshop. However, compared to rural areas, little is  
325 known about the experience and role of community-based traditional and faith-healing providers  
326 and how people with psychosis and their families navigate help-seeking journeys in Addis  
327 Ababa.  
328  
329 Our mapping study also indicated that efforts to decentralize mental health care through  
330 integration in primary health care facilities have not yet achieved their potential in Addis Ababa.

331 At present the patient flow for mental health care in primary health care centres is very low  
332 relative to projected population needs, while the specialist mental health services are  
333 overwhelmed. There are many potential advantages to the integration of mental health in primary  
334 health care services: accessibility, efficiency, affordability, acceptability, and greater potential  
335 for care that attends to both physical and mental health needs. Previous studies from Ethiopia  
336 have shown high levels of premature mortality in people with psychosis which is mostly caused  
337 by poor physical health (37).

338  
339 A study from Ethiopia examining the impact of the COVID-19 pandemic on mental health  
340 services concluded that more integrated, de-centralized mental health care would have made the  
341 mental health system more resilient and should be urgently prioritized(38).

342  
343 In rural settings in Ethiopia, task-shared mental health care within primary health care for people  
344 with psychosis has been shown to be safe and effective (39) but sustainability is limited by  
345 system constraints, including staff turnover, medication supply interruptions, and the lack of  
346 ongoing support from secondary mental health care services (40). In Addis Ababa, these system  
347 bottlenecks are less salient, but fragmentation of services is evident and currently undermines  
348 successful de-centralization. Nonetheless, the recent Ministry of Health initiative to develop  
349 “family health teams” could play a key role in improving care for people with psychosis. Family  
350 health teams provide community outreach from primary healthcare facilities, specifically focused  
351 on those who are vulnerable and would otherwise struggle to access care, including homeless  
352 populations. Given their prominent community footing, family health teams could contribute  
353 importantly to the early identification and ongoing engagement of people with psychosis in care.

354

355 Although we followed robust methods to map the resources, there were some limitations to our  
356 study. We only included registered and well-known traditional and faith healers in the study area,  
357 but we assume that more traditional healers may exist. It was also difficult to know the number  
358 of social organisations, such as *Tsiwa Mahber* and *Equb*.

359

## 360 Conclusions

361 We identified important community resources that may be used by people with severe mental  
362 illness. Since many people may have access to these resources, these approaches may be  
363 scalable. However, awareness-raising and stigma reduction efforts are needed to facilitate access  
364 for people with psychosis. Integrating community resources into mental health care can be a  
365 comprehensive, cost-effective, and long-lasting strategy.

366

## 367 Author Contributions

368 This study was conceived by CH and MT and designed by: TS, WF, AC, EM, and CH. Data  
369 were collected and analyzed by MT. The paper was drafted by MT and reviewed by TS, WF,  
370 AC, EM, and CH. All authors reviewed the final draft and approved the submission.

371

## 372 Acknowledgments

373 We are grateful for the support provided by the Addis Ababa sub-city administration, district  
374 administration, the health office, the health center workers, community leaders, and the  
375 community that participated as key informants. CH receives support from the National Institute  
376 for Health and Care Research (NIHR) through the NIHR Global Health Research Group on

377 Homelessness and Mental Health in Africa (NIHR134325) and the SPARK project  
378 (NIHR200842) using UK aid from the UK Government. The views expressed in this publication  
379 are those of the authors and not necessarily those of the NIHR or the Department of Health and  
380 Social Care. CH also receives support from WT grants 222154/Z20/Z and 223615/Z/21/Z.

381

382 Funding

383 The study was funded through Wellcome Trust grant number 222154/Z20/Z.

384

385 Conflict of interest

386 No conflict of interest

## 387 References

- 388 1. Demyttenaere K, Bruffaerts R, Posada-Villa J, Lepine J, Angermeyer M, Bernert S, et al. Prevalence,  
389 severity, and unmet need for treatment of mental disorders in the World Health Organization World  
390 Mental Health Surveys. *Journal of the American Medical Association*. 2004;291(21):2581-90.
- 391 2. Lora A, Kohn R, Levav I, McBain R, Morris J, Saxena S. Service availability and utilization and  
392 treatment gap for schizophrenic disorders: a survey in 50 low-and middle-income countries. *Bulletin of*  
393 *the World Health Organization*. 2012;90(1):47-54B.
- 394 3. Kohn R, Saxena S, Levav I, Saraceno B. The treatment gap in mental health care. *Bulletin of the*  
395 *World Health Organization*. 2004;82(11):858-66.
- 396 4. Hanlon C, Medhin G, Selamu M, Bihane R, Dewey M, Tirfessa K, et al. Impact of integrated district  
397 level mental health care on clinical and social outcomes of people with severe mental illness in rural  
398 Ethiopia: An intervention cohort study. *Epidemiology and Psychiatric Sciences*. . 2019;29:e45.
- 399 5. Kebede D, Alem A, Shibre T, Negash A, Deyassa N, Beyero T, et al. Short-term symptomatic and  
400 functional outcomes of schizophrenia in Butajira, Ethiopia. *Schizophrenia Research*. 2005;78(2):171-85.
- 401 6. Fekadu A, Medhin G, Lund C, Desilva M, Selamu M, Alem A, et al. The psychosis treatment gap  
402 and its consequences in rural Ethiopia. *BMC Psychiatry*. 2019;19(325).
- 403 7. Hanlon C, Alem A, Lund C, Hailemariam D, Assefa E, Giorgis TW, et al. Moving towards universal  
404 health coverage for mental disorders in Ethiopia. *International Journal of Mental Health Systems*.  
405 2019;13(1):11.
- 406 8. Schrimpf LA, Aggarwal A, Lauriello J. Psychosis. *Behavioral Neurology and Psychiatry*.  
407 2018;24(3):845-60.
- 408 9. Li J, Guo YB, Huang YG, Liu JW, Chen W, Zhang XY, et al. Stigma and discrimination experienced  
409 by people with schizophrenia living in the community in Guangzhou, China. *Psychiatry Research*.  
410 2017;255:225-31.
- 411 10. Wigand ME, Orzechowski M, Nowak M, Becker T, Steger F. Schizophrenia, human rights and  
412 access to health care: A systematic search and review of judgements by the European Court of Human  
413 Rights. *Int J Soc Psychiatry*. 2021;67(2):168-74.
- 414 11. Dutta M, Spoorthy MS, Patel S, Agarwala N. Factors responsible for delay in treatment seeking in  
415 patients with psychosis: A qualitative study. *Indian J Psychiatry*. 2019;61(1):53-9.
- 416 12. Ehmann TS, Tee KA, MacEwan G, Dalzell KL, Hanson LA, Smith GN, et al. Treatment delay and  
417 pathways to care in early psychosis. *Early Intervention in Psychiatry*. 2014;8(3):240-6.
- 418 13. Bekele YY, Flisher AJ, Alem A, Baheretebab Y. Pathways to psychiatric care in Ethiopia.  
419 *Psychological Medicine*. 2008;39(3):475-83.
- 420 14. Teshager S, Kerebih H, Hailesilassie H, Abera M. Pathways to psychiatric care and factors  
421 associated with delayed help-seeking among patients with mental illness in Northern Ethiopia: A cross-  
422 sectional study. *BMJ Open*. 2020;10.
- 423 15. Eaton J, McCay L, Semrau M, Chatterjee S, Baingana F, Araya R, et al. Scale up of services for  
424 mental health in low-income and middle-income countries. *Lancet (London, England)*.  
425 2011;378(9802):1592-603.
- 426 16. Hailemariam M, Fekadu A, Selamu M, Alem A, Medhin G, Giorgis TW, et al. Developing a mental  
427 health care plan in a low resource setting: the theory of change approach. *BMC Health Serv Res*.  
428 2015;15:429.
- 429 17. Tsiachristas A, Thomas T, Leal J, Lennox BR. Economic impact of early intervention in psychosis  
430 services: results from a longitudinal retrospective controlled study in England. *BMJ open*.  
431 2016;6(10):e012611.

- 432 18. Drake RJ, Husain N, Marshall M, Lewis SW, Tomenson B, Chaudhry IB, et al. Effect of delaying  
433 treatment of first-episode psychosis on symptoms and social outcomes: a longitudinal analysis and  
434 modelling study. *The Lancet Psychiatry*. 2020;7(7):602-10.
- 435 19. Fowler D, Hodgekins J, French P, Marshall M, Freemantle N, McCrone P, et al. Social recovery  
436 therapy in combination with early intervention services for enhancement of social recovery in patients  
437 with first-episode psychosis (SUPEREDEN3): a single-blind, randomised controlled trial. *The Lancet*  
438 *Psychiatry*. 2018;5(1):41-50.
- 439 20. World Health Organization. "Mental health crisis services: promoting person-centred and rights-  
440 based approaches"2021. Available from: <https://www.who.int/publications/i/item/9789240025721>.
- 441 21. Selamu M, Asher L, Hanlon C, Medhin G, Hailemariam M, Patel V, et al. Beyond the biomedical:  
442 community resources for mental health care in rural Ethiopia. *PLoS One*. 2015;10(5):e0126666.
- 443 22. Asher L, Fekadu A, Hanlon C, Mideksa G, Eaton J, Patel V, et al. Development of a community-  
444 based rehabilitation intervention for people with schizophrenia in Ethiopia. *PLoS ONE*. 2015;10(11).
- 445 23. Mall S, Hailemariam M, Selamu M, Fekadu A, Lund C, Patel V, et al. 'Restoring the person's life': a  
446 qualitative study to inform development of care for people with severe mental disorders in rural Ethiopia.  
447 *Epidemiology and Psychiatri Science*. 2017;26(1):43-52.
- 448 24. Tirfessa K, Lund C, Medhin G, Selamu M, Birhane R, Hailemichael Y, et al. Impact of integrated  
449 mental health care on food insecurity of households of people with severe mental illness in a rural African  
450 district: a community-based, controlled before-after study. *Tropical Medicine & International Health*.  
451 2020;25(4):414-23.
- 452 25. Asher L, Birhane R, Weiss HA, Medhin G, Selamu M, Patel V, et al. Community-based rehabilitation  
453 intervention for people with schizophrenia in Ethiopia (RISE): results of a 12-month cluster-randomised  
454 controlled trial. *Lancet Global Health*. 2022;10(4):E530-E42.
- 455 26. Fekadu A, Hanlon C, Gebre-Eyesus E, Agedew M, Solomon H, Teferra S, et al. Burden of mental  
456 disorders and unmet needs among street homeless people in Addis Ababa, Ethiopia. *BMC Medicine*.  
457 2014;12(1):1-12.
- 458 27. Collins T. Mobilizing communities: Asset building as a community development strategy.  
459 *Community Development*. 2016;47(5):746-7.
- 460 28. Graybeal C. Strengths-based social work assessment: Transforming the dominant paradigm.  
461 *Families in Society*. 2001;82(3):233-42.
- 462 29. Hanlon C, Roberts T, Misganaw E, Malla A, Cohen A, Kelkile TS, et al. Studying the context of  
463 psychoses to improve outcomes in Ethiopia (SCOPE): protocol paper. medRxiv [Internet]. 2023. Available  
464 from: <https://www.medrxiv.org/content/medrxiv/early/2023/10/10/2023.10.10.23296817>.
- 465 30. Addis Ababa, Administration. Projected Population Size by Sex, Area, and Density by Region, Zone,  
466 and Wereda, . Central Statistical Agency of Ethiopia (CSA), 2022.
- 467 31. Mugisha J, Abdulmalik J, Hanlon C, Petersen I, Lund C, Upadhaya N, et al. Health systems context  
468 (s) for integrating mental health into primary health care in six Emerald countries: a situation analysis.  
469 *International Journal of Mental Health Systems*. 2017;11(1):1-13.
- 470 32. Selamu M, Asher L, Hanlon C, Medhin G, Hailemariam M, Patel V, et al. Beyond the biomedical:  
471 Community resources for mental health care in rural Ethiopia. *PLoS ONE*. 2015;10(126666).
- 472 33. Girma E, Ketema B, Mulatu T, Kohrt BA, Wahid SS, Heim E, et al. Mental health stigma and  
473 discrimination in Ethiopia: evidence synthesis to inform stigma reduction interventions. *International*  
474 *Journal of Mental Health Systems*. 2022;16(1):30.
- 475 34. Lund C, Breen A, Flisher AJ, Kakuma R, Corrigall J, Joska JA, et al. Poverty and common mental  
476 disorders in low and middle income countries: A systematic review. *Soc Sci Med*. 2010;71(3):517-28.
- 477 35. Thornicroft G, Sunkel C, Aliev AA, Baker S, Brohan E, El Chammay R, et al. The Lancet Commission  
478 on ending stigma and discrimination in mental health. *The Lancet*. 2022;400(10361):1438-80.



- 479 36. Belachew A, Molla M, Fekadu A. Who Are The Traditional Healers Treating Mental Illnesses In  
480 Rural Ethiopia? A population-Based Descriptive Study. bioRxiv; 2019.
- 481 37. Fekadu A, Medhin G, Kebede D, Alem A, Cleare AJ, Prince MJ, et al. Excess mortality in severe  
482 mental illness: 10-year population-based cohort study in rural Ethiopia. *British Journal of Psychiatry*.  
483 2015;206:289 - 96.
- 484 38. Mihretu A, Fekadu W, Alemu AA, Amare B, Assefa D, Misganaw E, et al. Impact of the COVID-19  
485 pandemic on mental health care and people with mental health conditions in Ethiopia: the MASC mixed-  
486 methods study2022 2022. Available from: <https://www.ncbi.nlm.nih.gov/pmc/articles/PMC10699067/>.
- 487 39. Hanlon C, Medhin G, Dewey ME, Prince M, Assefa E, Shibre T, et al. Efficacy and cost-effectiveness  
488 of task-shared care for people with severe mental disorders in Ethiopia (TaSCS): a single-blind,  
489 randomised, controlled, phase 3 non-inferiority trial. *The Lancet Psychiatry*. 2022;9(1):59-71.
- 490 40. Hanlon C, Eshetu T, Alemayehu D, Fekadu A, Semrau M, Thornicroft G, et al. Health system  
491 governance to support scale up of mental health care in Ethiopia: a qualitative study. *International Journal*  
492 *of Mental Health Systems*. 2017;11(1):1-16.

493

494 Supporting information

495 **S1 Fig. Protestant Christian church program adverts**

496 **S2 Fig. Type of herbal plants posted at the traditional healer healing site**

497 **S3 Fig. St Mary's Orthodox Christian Church, Entoto, Addis Ababa, Ethiopia**

498

Sitota psychiatric clinic

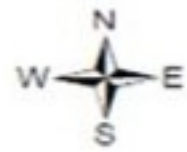

Lebeza Psychiatric Clinic

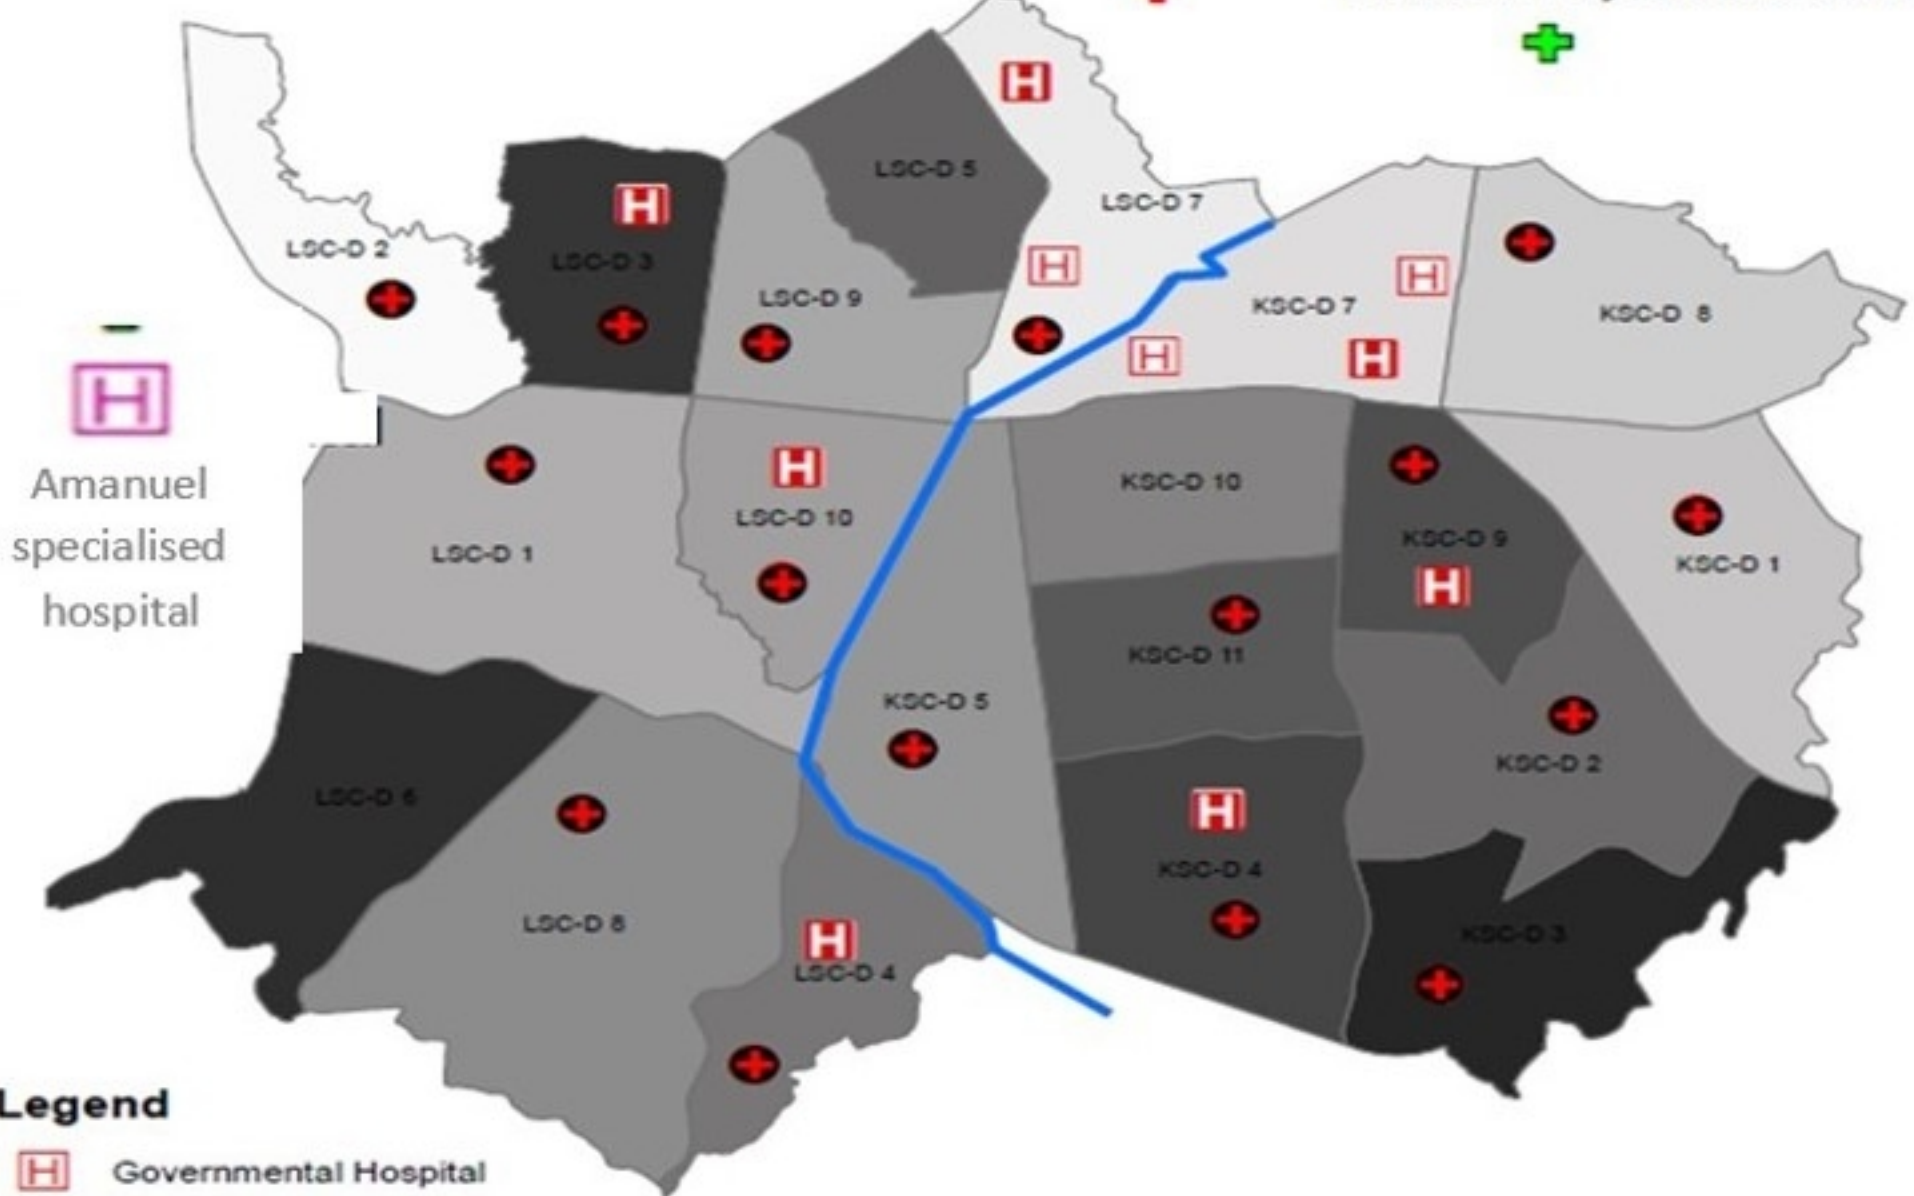

Amanuel specialised hospital

**Legend**

- Governmental Hospital
- Private Hospital
- Sitota psychiatric clinic
- Lebeza psychiatric clinic
- Amanuel specialized hospital
- Health Center
- boundary between Lideta and Kirkos sub-cities

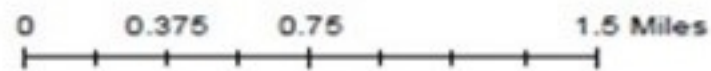

Figure

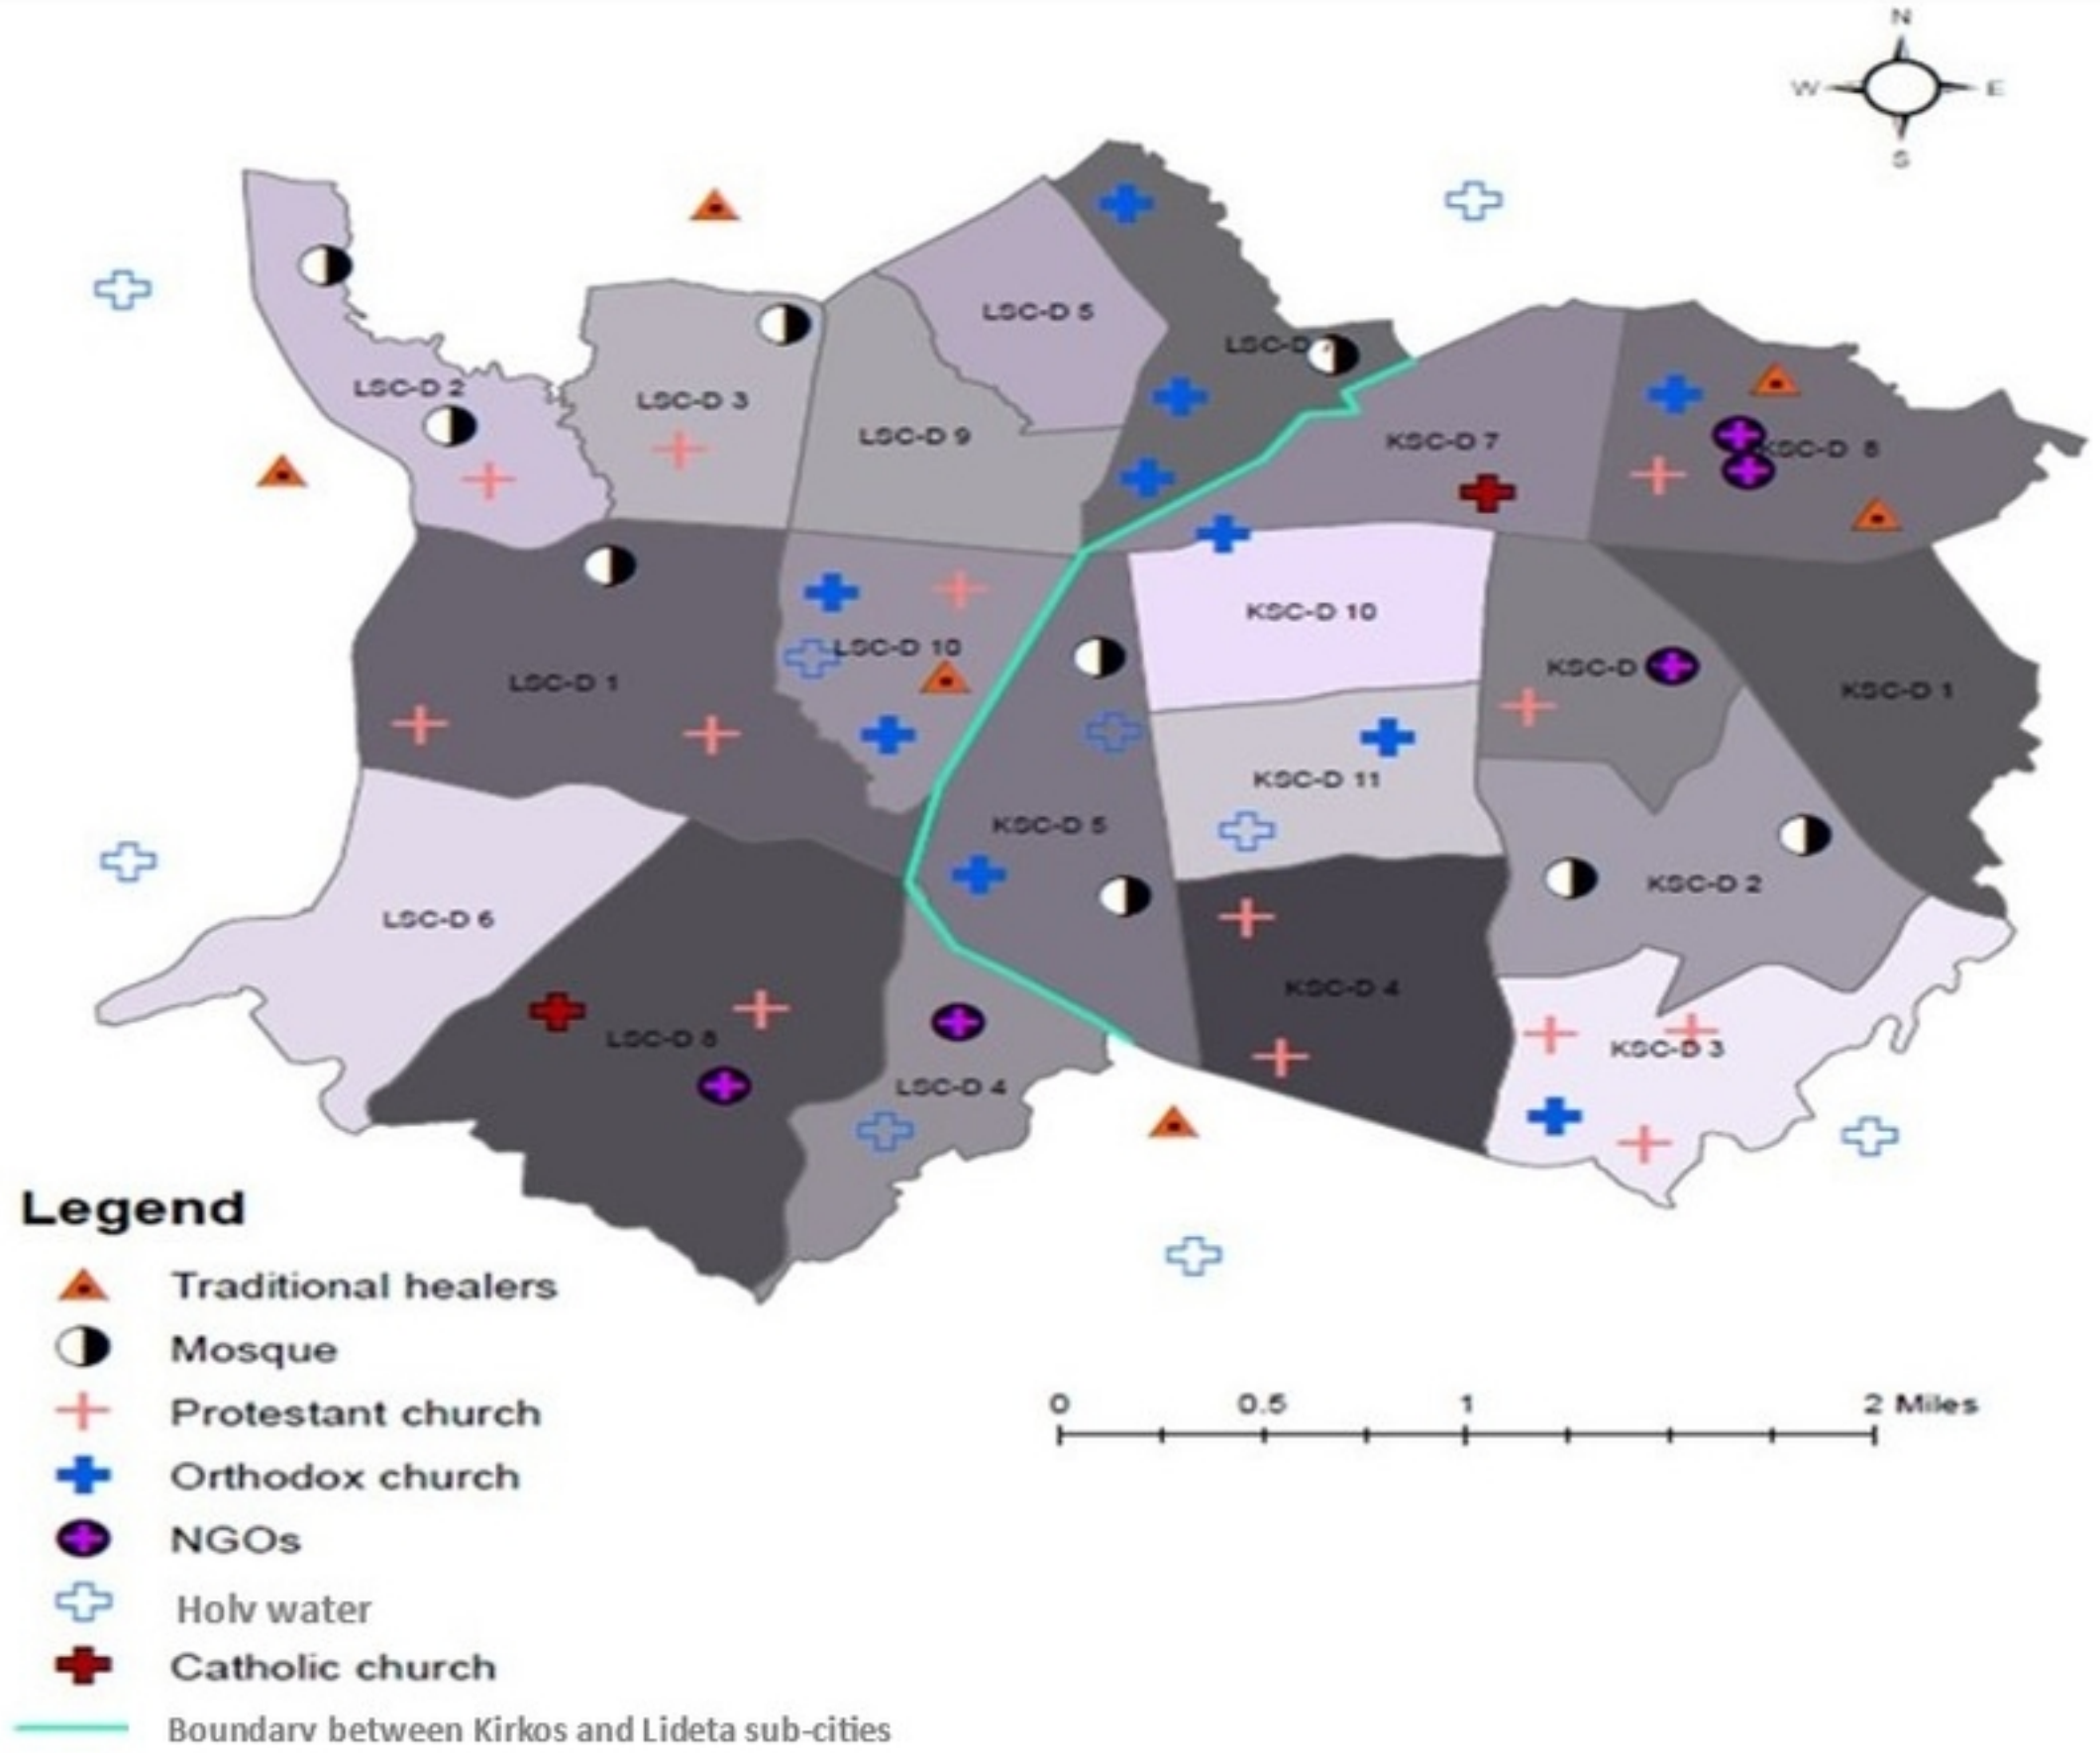

Figure
